# Supplementary material
Source: publisher site journal article supplement (https://static.cambridge.org/content/id/urn:cambridge.org:id:article:S0016756818000900/resource/name/S0016756818000900supp001.doc)
Supplement: Supplementary file 1 [file S0016756818000900supp001.doc]

**Geological Magazine**

**A Palaeoproterozoic basement beneath the Rangnim Massif revealed by the *in situ* U-Pb ages and Hf isotopes of xenocrystic zircons from Triassic kimberlites of the North Korea**

Yu-Sheng Zhu, Jin-Hui Yang, Hao Wang, Fu-Yuan Wu

**Supplementary Material**

| Supplementary Table S1. LA-ICPMS U-Pb data for zircon xenocrysts from the kimberlites in North Korea | | | | | | | | | | | | | | | | | | |
| --- | --- | --- | --- | --- | --- | --- | --- | --- | --- | --- | --- | --- | --- | --- | --- | --- | --- | --- |
| Sample No. | Contents (ppm) | | | Th/U |  | Isotopic ratios | | | | | |  | Age (Ma) | | | | | |
| Pb | Th | U |  | 207Pb/206Pb | ±1σ | 207Pb/235U | ±1σ | 206Pb/238U | ±1σ |  | 207Pb/206Pb | ±1σ | 207Pb/235U | ±1σ | 206Pb/238U | ±1σ |
| 11NK11 02 | 438 | 306 | 866 | 0.35 |  | 0.1551 | 0.0010 | 9.6699 | 0.0573 | 0.4523 | 0.0043 |  | 2402 | 11 | 2404 | 5 | 2405 | 19 |
| 11NK11 03 | 119 | 169 | 280 | 0.61 |  | 0.1158 | 0.0017 | 5.2476 | 0.0725 | 0.3285 | 0.0044 |  | 1893 | 27 | 1860 | 12 | 1831 | 21 |
| 11NK11 04 | 73 | 49 | 190 | 0.26 |  | 0.1158 | 0.0010 | 5.4469 | 0.0427 | 0.3411 | 0.0034 |  | 1892 | 15 | 1892 | 7 | 1892 | 17 |
| 11NK11 07 | 103 | 71 | 284 | 0.25 |  | 0.1153 | 0.0009 | 5.0139 | 0.0364 | 0.3153 | 0.0031 |  | 1885 | 14 | 1822 | 6 | 1767 | 15 |
| 11NK11 09 | 127 | 64 | 344 | 0.19 |  | 0.1144 | 0.0011 | 5.1945 | 0.0448 | 0.3294 | 0.0034 |  | 1870 | 17 | 1852 | 7 | 1835 | 17 |
| 11NK11 10 | 293 | 100 | 823 | 0.12 |  | 0.1163 | 0.0007 | 5.1494 | 0.0288 | 0.3210 | 0.0029 |  | 1901 | 11 | 1844 | 5 | 1795 | 14 |
| 11NK11 11 | 125 | 75 | 349 | 0.22 |  | 0.1163 | 0.0010 | 5.1836 | 0.0401 | 0.3232 | 0.0032 |  | 1900 | 15 | 1850 | 7 | 1805 | 16 |
| 11NK11 12 | 141 | 100 | 375 | 0.27 |  | 0.1155 | 0.0010 | 5.4140 | 0.0406 | 0.3398 | 0.0034 |  | 1888 | 15 | 1887 | 6 | 1886 | 16 |
| 11NK11 13c* | 168 | 202 | 421 | 0.48 |  | 0.1161 | 0.0008 | 5.4729 | 0.0329 | 0.3418 | 0.0032 |  | 1897 | 12 | 1896 | 5 | 1895 | 15 |
| 11NK11 14c | 277 | 190 | 564 | 0.34 |  | 0.1160 | 0.0009 | 5.3822 | 0.0379 | 0.3366 | 0.0033 |  | 1895 | 14 | 1882 | 6 | 1870 | 16 |
| 11NK11 15c | 113 | 56 | 297 | 0.19 |  | 0.1164 | 0.0008 | 5.4777 | 0.0351 | 0.3413 | 0.0032 |  | 1901 | 13 | 1897 | 6 | 1893 | 16 |
| 11NK11 17 | 181 | 64 | 475 | 0.13 |  | 0.1160 | 0.0007 | 5.4614 | 0.0306 | 0.3414 | 0.0031 |  | 1896 | 11 | 1895 | 5 | 1893 | 15 |
| 11NK11 23 | 198 | 181 | 498 | 0.36 |  | 0.1148 | 0.0009 | 5.3465 | 0.0371 | 0.3377 | 0.0033 |  | 1877 | 14 | 1876 | 6 | 1876 | 16 |
| 11NK11 24 | 278 | 139 | 720 | 0.19 |  | 0.1126 | 0.0012 | 5.1407 | 0.0526 | 0.3312 | 0.0060 |  | 1842 | 18 | 1843 | 9 | 1844 | 29 |
| 11NK11 26c | 117 | 137 | 272 | 0.50 |  | 0.1143 | 0.0015 | 5.3707 | 0.0663 | 0.3411 | 0.0064 |  | 1868 | 17 | 1880 | 11 | 1892 | 31 |
| 11NK11 27 | 72 | 147 | 152 | 0.97 |  | 0.1123 | 0.0018 | 5.1830 | 0.0779 | 0.3348 | 0.0067 |  | 1837 | 17 | 1850 | 13 | 1862 | 32 |
| 11NK11 29 | 147 | 95 | 390 | 0.24 |  | 0.1153 | 0.0014 | 5.0731 | 0.0583 | 0.3193 | 0.0059 |  | 1885 | 18 | 1832 | 10 | 1786 | 29 |
| 11NK11 31 | 162 | 147 | 401 | 0.37 |  | 0.1134 | 0.0014 | 5.1459 | 0.0600 | 0.3291 | 0.0061 |  | 1855 | 18 | 1844 | 10 | 1834 | 30 |
| 11NK11 32c | 144 | 92 | 370 | 0.25 |  | 0.1149 | 0.0015 | 5.1766 | 0.0611 | 0.3269 | 0.0061 |  | 1878 | 18 | 1849 | 10 | 1823 | 30 |
| 11NK11 33 | 313 | 103 | 905 | 0.11 |  | 0.1122 | 0.0012 | 4.6573 | 0.0469 | 0.3012 | 0.0054 |  | 1835 | 19 | 1760 | 8 | 1697 | 27 |
| 11NK11 37 | 284 | 94 | 772 | 0.12 |  | 0.1144 | 0.0013 | 5.0268 | 0.0518 | 0.3189 | 0.0058 |  | 1870 | 18 | 1824 | 9 | 1784 | 28 |
| 11NK11 39 | 227 | 87 | 604 | 0.14 |  | 0.1147 | 0.0013 | 5.1280 | 0.0552 | 0.3243 | 0.0059 |  | 1875 | 18 | 1841 | 9 | 1811 | 29 |
| 11NK11 44 | 229 | 176 | 589 | 0.30 |  | 0.1150 | 0.0014 | 5.1117 | 0.0555 | 0.3224 | 0.0059 |  | 1881 | 18 | 1838 | 9 | 1801 | 29 |
| 11NK11 52 | 129 | 100 | 316 | 0.32 |  | 0.1165 | 0.0017 | 5.3679 | 0.0713 | 0.3343 | 0.0064 |  | 1903 | 17 | 1880 | 11 | 1859 | 31 |
| 11NK11 53 | 102 | 90 | 247 | 0.37 |  | 0.1149 | 0.0018 | 5.3391 | 0.0774 | 0.3372 | 0.0066 |  | 1878 | 17 | 1875 | 12 | 1873 | 32 |
| 11NK11 57 | 106 | 83 | 281 | 0.30 |  | 0.1148 | 0.0015 | 5.0456 | 0.0584 | 0.3190 | 0.0055 |  | 1876 | 23 | 1827 | 10 | 1785 | 27 |
| 11NK11 58 | 138 | 202 | 443 | 0.46 |  | 0.1174 | 0.0021 | 4.9374 | 0.0813 | 0.3053 | 0.0056 |  | 1917 | 32 | 1809 | 14 | 1717 | 28 |
| 11NK11 59c | 150 | 79 | 357 | 0.22 |  | 0.1175 | 0.0022 | 5.5114 | 0.0956 | 0.3407 | 0.0063 |  | 1918 | 33 | 1902 | 15 | 1890 | 30 |
| 11NK11 60c | 130 | 86 | 287 | 0.30 |  | 0.1185 | 0.0021 | 5.5412 | 0.0897 | 0.3395 | 0.0062 |  | 1934 | 31 | 1907 | 14 | 1884 | 30 |
| 11NK11 61c | 246 | 201 | 497 | 0.40 |  | 0.1340 | 0.0017 | 7.3603 | 0.0837 | 0.3988 | 0.0069 |  | 2151 | 22 | 2156 | 10 | 2164 | 32 |
| 11NK12 03 | 28 | 86 | 378 | 0.23 |  | 0.0570 | 0.0014 | 0.5834 | 0.0135 | 0.0742 | 0.0011 |  | 493 | 55 | 467 | 9 | 461 | 6 |
| 11NK12 04 | 18 | 86 | 231 | 0.37 |  | 0.0611 | 0.0021 | 0.6309 | 0.0199 | 0.0749 | 0.0014 |  | 641 | 73 | 497 | 12 | 466 | 8 |
| 11NK12 05 | 36 | 28 | 491 | 0.06 |  | 0.0593 | 0.0013 | 0.6077 | 0.0125 | 0.0743 | 0.0010 |  | 578 | 48 | 482 | 8 | 462 | 6 |
| 11NK13 01 | 79 | 40 | 207 | 0.19 |  | 0.1156 | 0.0012 | 5.4235 | 0.0535 | 0.3402 | 0.0038 |  | 1889 | 19 | 1889 | 8 | 1887 | 18 |
| 11NK13 05 | 71 | 46 | 190 | 0.24 |  | 0.1157 | 0.0013 | 5.4160 | 0.0576 | 0.3395 | 0.0039 |  | 1890 | 21 | 1887 | 9 | 1885 | 19 |
| 11NK13 06 | 79 | 52 | 203 | 0.26 |  | 0.1151 | 0.0009 | 5.3420 | 0.0385 | 0.3366 | 0.0033 |  | 1881 | 14 | 1876 | 6 | 1871 | 16 |
| 11NK13 07 | 99 | 36 | 277 | 0.13 |  | 0.1145 | 0.0012 | 5.3154 | 0.0523 | 0.3366 | 0.0037 |  | 1872 | 19 | 1871 | 8 | 1870 | 18 |
| 11NK13 10 | 99 | 145 | 245 | 0.59 |  | 0.1172 | 0.0013 | 5.3027 | 0.0545 | 0.3281 | 0.0037 |  | 1914 | 20 | 1869 | 9 | 1829 | 18 |
| 11NK13 12 | 123 | 286 | 277 | 1.03 |  | 0.1144 | 0.0012 | 5.2922 | 0.0499 | 0.3354 | 0.0036 |  | 1871 | 18 | 1868 | 8 | 1865 | 18 |
| 11NK13 13 | 139 | 217 | 338 | 0.64 |  | 0.1148 | 0.0011 | 5.2617 | 0.0441 | 0.3325 | 0.0034 |  | 1876 | 16 | 1863 | 7 | 1851 | 17 |
| 11NK13 15 | 145 | 65 | 403 | 0.16 |  | 0.1160 | 0.0010 | 5.2998 | 0.0435 | 0.3312 | 0.0034 |  | 1896 | 16 | 1869 | 7 | 1844 | 16 |
| 11NK13 16 | 159 | 63 | 430 | 0.15 |  | 0.1148 | 0.0008 | 5.3557 | 0.0337 | 0.3382 | 0.0032 |  | 1877 | 12 | 1878 | 5 | 1878 | 15 |
| 11NK13 17 | 208 | 389 | 513 | 0.76 |  | 0.1159 | 0.0008 | 5.0534 | 0.0296 | 0.3162 | 0.0029 |  | 1894 | 12 | 1828 | 5 | 1771 | 14 |
| 11NK13 19 | 149 | 120 | 399 | 0.30 |  | 0.1139 | 0.0010 | 5.1812 | 0.0410 | 0.3298 | 0.0033 |  | 1863 | 16 | 1850 | 7 | 1837 | 16 |
| 11NK13 20 | 109 | 102 | 293 | 0.35 |  | 0.1160 | 0.0014 | 5.4442 | 0.0593 | 0.3403 | 0.0040 |  | 1896 | 21 | 1892 | 9 | 1888 | 19 |
| 11NK13 22 | 229 | 84 | 592 | 0.14 |  | 0.1154 | 0.0012 | 5.3471 | 0.0529 | 0.3362 | 0.0061 |  | 1886 | 19 | 1876 | 8 | 1868 | 29 |
| 11NK13 24 | 203 | 91 | 516 | 0.18 |  | 0.1151 | 0.0013 | 5.3859 | 0.0550 | 0.3397 | 0.0062 |  | 1881 | 19 | 1883 | 9 | 1885 | 30 |
| 11NK13 32 | 90 | 172 | 195 | 0.88 |  | 0.1153 | 0.0019 | 5.2126 | 0.0791 | 0.3281 | 0.0066 |  | 1885 | 17 | 1855 | 13 | 1829 | 32 |
| 11NK13 35 | 224 | 317 | 508 | 0.62 |  | 0.1171 | 0.0016 | 5.4971 | 0.0675 | 0.3405 | 0.0064 |  | 1913 | 17 | 1900 | 11 | 1889 | 31 |
| 11NK13 37 | 191 | 104 | 482 | 0.22 |  | 0.1155 | 0.0016 | 5.3635 | 0.0699 | 0.3369 | 0.0065 |  | 1888 | 17 | 1879 | 11 | 1872 | 31 |
| 11NK13 38 | 142 | 249 | 311 | 0.80 |  | 0.1155 | 0.0016 | 5.3728 | 0.0673 | 0.3375 | 0.0064 |  | 1888 | 17 | 1881 | 11 | 1875 | 31 |
| 11NK13 39 | 199 | 71 | 520 | 0.14 |  | 0.1147 | 0.0014 | 5.2407 | 0.0586 | 0.3315 | 0.0061 |  | 1875 | 18 | 1859 | 10 | 1846 | 30 |
| 11NK13 44 | 152 | 101 | 382 | 0.26 |  | 0.1153 | 0.0017 | 5.3203 | 0.0709 | 0.3348 | 0.0065 |  | 1885 | 17 | 1872 | 11 | 1861 | 31 |
| 11NK13 46 | 181 | 102 | 492 | 0.21 |  | 0.1103 | 0.0030 | 4.5704 | 0.0846 | 0.3004 | 0.0058 |  | 1805 | 50 | 1744 | 15 | 1693 | 29 |
| 11NK13 49 | 196 | 127 | 515 | 0.25 |  | 0.1149 | 0.0028 | 5.0490 | 0.0797 | 0.3188 | 0.0059 |  | 1878 | 45 | 1828 | 13 | 1784 | 29 |
| 11NK13 52 | 212 | 295 | 532 | 0.56 |  | 0.1166 | 0.0014 | 4.9686 | 0.0560 | 0.3092 | 0.0057 |  | 1905 | 18 | 1814 | 10 | 1737 | 28 |
| 11NK13 58 | 115 | 76 | 277 | 0.27 |  | 0.1164 | 0.0017 | 5.5251 | 0.0741 | 0.3445 | 0.0063 |  | 1902 | 26 | 1905 | 12 | 1908 | 30 |
| 11NK13 60 | 92 | 94 | 223 | 0.42 |  | 0.1168 | 0.0014 | 5.5036 | 0.0629 | 0.3420 | 0.0062 |  | 1908 | 22 | 1901 | 10 | 1896 | 30 |
| 11NK14 02 | 129 | 97 | 324 | 0.30 |  | 0.1155 | 0.0008 | 5.4103 | 0.0320 | 0.3396 | 0.0031 |  | 1888 | 12 | 1887 | 5 | 1885 | 15 |
| 11NK14 04 | 148 | 135 | 388 | 0.35 |  | 0.1156 | 0.0011 | 5.2455 | 0.0460 | 0.3291 | 0.0035 |  | 1889 | 17 | 1860 | 7 | 1834 | 17 |
| 11NK14 08 | 165 | 124 | 483 | 0.26 |  | 0.1153 | 0.0010 | 5.2233 | 0.0424 | 0.3286 | 0.0033 |  | 1884 | 16 | 1856 | 7 | 1832 | 16 |
| 11NK14 09 | 93 | 73 | 241 | 0.30 |  | 0.1160 | 0.0010 | 5.4037 | 0.0443 | 0.3377 | 0.0035 |  | 1896 | 16 | 1885 | 7 | 1876 | 17 |
| 11NK14 13 | 113 | 59 | 313 | 0.19 |  | 0.1147 | 0.0009 | 5.0638 | 0.0342 | 0.3201 | 0.0031 |  | 1875 | 13 | 1830 | 6 | 1790 | 15 |
| 11NK14 16 | 76 | 47 | 207 | 0.23 |  | 0.1156 | 0.0014 | 5.2689 | 0.0572 | 0.3307 | 0.0038 |  | 1888 | 21 | 1864 | 9 | 1842 | 18 |
| 11NK14 17 | 123 | 57 | 340 | 0.17 |  | 0.1162 | 0.0009 | 5.0406 | 0.0347 | 0.3146 | 0.0030 |  | 1899 | 14 | 1826 | 6 | 1763 | 15 |
| 11NK14 20 | 116 | 77 | 362 | 0.21 |  | 0.1157 | 0.0012 | 5.2328 | 0.0476 | 0.3280 | 0.0035 |  | 1891 | 18 | 1858 | 8 | 1829 | 17 |
| 11NK14 21 | 52 | 68 | 91 | 0.74 |  | 0.1552 | 0.0021 | 9.6541 | 0.1224 | 0.4510 | 0.0061 |  | 2404 | 23 | 2402 | 12 | 2400 | 27 |
| 11NK14 22 | 124 | 52 | 351 | 0.15 |  | 0.1152 | 0.0011 | 5.2626 | 0.0445 | 0.3312 | 0.0034 |  | 1884 | 17 | 1863 | 7 | 1844 | 17 |
| 11NK14 23 | 85 | 50 | 238 | 0.21 |  | 0.1150 | 0.0011 | 5.0175 | 0.0447 | 0.3164 | 0.0033 |  | 1880 | 18 | 1822 | 8 | 1772 | 16 |
| 11NK14 24 | 65 | 60 | 168 | 0.36 |  | 0.1148 | 0.0010 | 5.3302 | 0.0435 | 0.3368 | 0.0034 |  | 1876 | 16 | 1874 | 7 | 1871 | 16 |
| 11NK14 26 | 138 | 281 | 318 | 0.88 |  | 0.1229 | 0.0011 | 5.6525 | 0.0451 | 0.3335 | 0.0034 |  | 1999 | 15 | 1924 | 7 | 1855 | 16 |
| 11NK14 27 | 80 | 56 | 211 | 0.27 |  | 0.1144 | 0.0009 | 5.2945 | 0.0392 | 0.3356 | 0.0033 |  | 1871 | 15 | 1868 | 6 | 1866 | 16 |
| 11NK14 28 | 133 | 133 | 433 | 0.31 |  | 0.1171 | 0.0010 | 5.0818 | 0.0397 | 0.3147 | 0.0032 |  | 1913 | 15 | 1833 | 7 | 1764 | 15 |
| 11NK14 29 | 83 | 77 | 217 | 0.35 |  | 0.1163 | 0.0010 | 5.0927 | 0.0379 | 0.3175 | 0.0031 |  | 1901 | 15 | 1835 | 6 | 1778 | 15 |
| 11NK14 30 | 95 | 90 | 251 | 0.36 |  | 0.1144 | 0.0012 | 5.2021 | 0.0494 | 0.3297 | 0.0036 |  | 1871 | 19 | 1853 | 8 | 1837 | 17 |
| 11NK14 32 | 166 | 72 | 453 | 0.16 |  | 0.1146 | 0.0008 | 5.2916 | 0.0331 | 0.3348 | 0.0031 |  | 1874 | 12 | 1868 | 5 | 1862 | 15 |
| 11NK14 34 | 98 | 80 | 227 | 0.35 |  | 0.1188 | 0.0018 | 5.6597 | 0.0769 | 0.3455 | 0.0067 |  | 1939 | 17 | 1925 | 12 | 1913 | 32 |
| 11NK14 36 | 146 | 95 | 373 | 0.26 |  | 0.1123 | 0.0014 | 5.0517 | 0.0586 | 0.3262 | 0.0060 |  | 1838 | 18 | 1828 | 10 | 1820 | 29 |
| 11NK14 40 | 132 | 79 | 353 | 0.22 |  | 0.1139 | 0.0014 | 4.9479 | 0.0573 | 0.3153 | 0.0058 |  | 1862 | 17 | 1810 | 10 | 1767 | 28 |
| 11NK14 42 | 162 | 126 | 448 | 0.28 |  | 0.1153 | 0.0014 | 4.7743 | 0.0528 | 0.3004 | 0.0055 |  | 1884 | 18 | 1780 | 9 | 1693 | 27 |
| 11NK14 43 | 91 | 79 | 223 | 0.36 |  | 0.1124 | 0.0016 | 5.1231 | 0.0665 | 0.3306 | 0.0063 |  | 1839 | 17 | 1840 | 11 | 1841 | 30 |
| 11NK14 44 | 166 | 166 | 421 | 0.39 |  | 0.1136 | 0.0014 | 4.9688 | 0.0548 | 0.3174 | 0.0058 |  | 1857 | 18 | 1814 | 9 | 1777 | 28 |
| 11NK14 45 | 134 | 80 | 337 | 0.24 |  | 0.1131 | 0.0014 | 5.1926 | 0.0596 | 0.3329 | 0.0061 |  | 1850 | 18 | 1851 | 10 | 1853 | 30 |
| 11NK14 46 | 140 | 104 | 373 | 0.28 |  | 0.1132 | 0.0014 | 4.8723 | 0.0547 | 0.3122 | 0.0057 |  | 1851 | 18 | 1797 | 9 | 1752 | 28 |
| 11NK14 48 | 125 | 281 | 267 | 1.05 |  | 0.1145 | 0.0017 | 5.1450 | 0.0719 | 0.3260 | 0.0063 |  | 1871 | 17 | 1844 | 12 | 1819 | 31 |
| 11NK14 51 | 224 | 200 | 561 | 0.36 |  | 0.1133 | 0.0013 | 5.0667 | 0.0521 | 0.3245 | 0.0058 |  | 1852 | 18 | 1831 | 9 | 1812 | 28 |
| 11NK14 52 | 212 | 96 | 572 | 0.17 |  | 0.1154 | 0.0013 | 4.9933 | 0.0521 | 0.3139 | 0.0057 |  | 1886 | 18 | 1818 | 9 | 1760 | 28 |
| 11NK14 53 | 134 | 105 | 363 | 0.29 |  | 0.1149 | 0.0014 | 4.8315 | 0.0537 | 0.3050 | 0.0056 |  | 1878 | 18 | 1790 | 9 | 1716 | 27 |
| 11NK14 54 | 132 | 73 | 334 | 0.22 |  | 0.1121 | 0.0013 | 5.1431 | 0.0559 | 0.3329 | 0.0060 |  | 1833 | 18 | 1843 | 9 | 1852 | 29 |
| 11NK14 55 | 181 | 64 | 469 | 0.14 |  | 0.1123 | 0.0013 | 5.1291 | 0.0539 | 0.3313 | 0.0060 |  | 1837 | 18 | 1841 | 9 | 1845 | 29 |
| 11NK14 57 | 210 | 214 | 507 | 0.42 |  | 0.1138 | 0.0013 | 5.1888 | 0.0550 | 0.3308 | 0.0060 |  | 1861 | 18 | 1851 | 9 | 1842 | 29 |
| 11NK14 58 | 87 | 72 | 211 | 0.34 |  | 0.1132 | 0.0016 | 5.2588 | 0.0673 | 0.3369 | 0.0063 |  | 1852 | 17 | 1862 | 11 | 1872 | 31 |
| 11NK14 62 | 79 | 56 | 209 | 0.27 |  | 0.1135 | 0.0017 | 4.9002 | 0.0663 | 0.3132 | 0.0060 |  | 1856 | 17 | 1802 | 11 | 1757 | 29 |
| T-1 01 | 73 | 78 | 178 | 0.44 |  | 0.1150 | 0.0009 | 5.3609 | 0.0395 | 0.3382 | 0.0033 |  | 1879 | 15 | 1879 | 6 | 1878 | 16 |
| T-1 02 | 111 | 71 | 307 | 0.23 |  | 0.1139 | 0.0012 | 5.0798 | 0.0499 | 0.3235 | 0.0035 |  | 1862 | 19 | 1833 | 8 | 1807 | 17 |
| T-1 04 | 152 | 49 | 413 | 0.12 |  | 0.1167 | 0.0008 | 5.2733 | 0.0315 | 0.3278 | 0.0030 |  | 1906 | 12 | 1865 | 5 | 1828 | 15 |
| T-1 07 | 118 | 75 | 309 | 0.24 |  | 0.1153 | 0.0010 | 5.2941 | 0.0427 | 0.3331 | 0.0034 |  | 1884 | 16 | 1868 | 7 | 1853 | 16 |
| T-1 09 | 97 | 56 | 278 | 0.20 |  | 0.1155 | 0.0009 | 4.9504 | 0.0343 | 0.3109 | 0.0030 |  | 1887 | 14 | 1811 | 6 | 1745 | 15 |
| T-1 10 | 122 | 48 | 346 | 0.14 |  | 0.1161 | 0.0011 | 5.4612 | 0.0469 | 0.3413 | 0.0035 |  | 1896 | 17 | 1895 | 7 | 1893 | 17 |
| T-1 11 | 134 | 45 | 369 | 0.12 |  | 0.1151 | 0.0008 | 5.1504 | 0.0326 | 0.3246 | 0.0030 |  | 1881 | 13 | 1845 | 5 | 1812 | 15 |
| T-1 13 | 74 | 42 | 197 | 0.22 |  | 0.1156 | 0.0011 | 5.2843 | 0.0477 | 0.3317 | 0.0035 |  | 1889 | 18 | 1866 | 8 | 1846 | 17 |
| T-1 15 | 173 | 246 | 303 | 0.81 |  | 0.1588 | 0.0011 | 10.0745 | 0.0635 | 0.4602 | 0.0044 |  | 2442 | 12 | 2442 | 6 | 2441 | 19 |
| T-1 16 | 115 | 54 | 325 | 0.17 |  | 0.1151 | 0.0008 | 4.9857 | 0.0298 | 0.3140 | 0.0029 |  | 1882 | 12 | 1817 | 5 | 1761 | 14 |
| T-1 19 | 55 | 39 | 139 | 0.28 |  | 0.1152 | 0.0009 | 5.3476 | 0.0390 | 0.3368 | 0.0033 |  | 1883 | 14 | 1877 | 6 | 1871 | 16 |
| T-1 21 | 126 | 186 | 357 | 0.52 |  | 0.1133 | 0.0008 | 4.5858 | 0.0290 | 0.2935 | 0.0027 |  | 1853 | 13 | 1747 | 5 | 1659 | 14 |
| T-1 22 | 89 | 70 | 227 | 0.31 |  | 0.1162 | 0.0009 | 5.4749 | 0.0374 | 0.3417 | 0.0033 |  | 1899 | 14 | 1897 | 6 | 1895 | 16 |
| T-1 28 | 82 | 57 | 211 | 0.27 |  | 0.1150 | 0.0009 | 5.3479 | 0.0371 | 0.3374 | 0.0032 |  | 1879 | 14 | 1877 | 6 | 1874 | 16 |
| T-1 29 | 78 | 54 | 200 | 0.27 |  | 0.1153 | 0.0009 | 5.3671 | 0.0363 | 0.3378 | 0.0032 |  | 1884 | 13 | 1880 | 6 | 1876 | 15 |
| T-1 31 | 112 | 156 | 284 | 0.55 |  | 0.1113 | 0.0015 | 4.7604 | 0.0580 | 0.3102 | 0.0058 |  | 1821 | 17 | 1778 | 10 | 1742 | 28 |
| T-1 34 | 185 | 76 | 489 | 0.16 |  | 0.1128 | 0.0013 | 5.0149 | 0.0524 | 0.3224 | 0.0058 |  | 1845 | 18 | 1822 | 9 | 1801 | 28 |
| T-1 36 | 106 | 119 | 271 | 0.44 |  | 0.1140 | 0.0015 | 4.9085 | 0.0573 | 0.3121 | 0.0057 |  | 1865 | 17 | 1804 | 10 | 1751 | 28 |
| T-1 37 | 140 | 75 | 343 | 0.22 |  | 0.1148 | 0.0014 | 5.3800 | 0.0620 | 0.3400 | 0.0062 |  | 1876 | 17 | 1882 | 10 | 1887 | 30 |
| T-1 40 | 177 | 77 | 450 | 0.17 |  | 0.1126 | 0.0013 | 5.1556 | 0.0560 | 0.3320 | 0.0060 |  | 1842 | 18 | 1845 | 9 | 1848 | 29 |
| T-1 43 | 136 | 44 | 386 | 0.11 |  | 0.1123 | 0.0014 | 4.6732 | 0.0532 | 0.3019 | 0.0055 |  | 1836 | 17 | 1762 | 10 | 1701 | 27 |
| T-1 47 | 91 | 65 | 220 | 0.29 |  | 0.1143 | 0.0015 | 5.3006 | 0.0656 | 0.3363 | 0.0063 |  | 1869 | 17 | 1869 | 11 | 1869 | 30 |
| T-1 49 | 107 | 155 | 201 | 0.77 |  | 0.1416 | 0.0022 | 7.5134 | 0.1053 | 0.3849 | 0.0076 |  | 2246 | 16 | 2175 | 13 | 2099 | 35 |
| T-1 51 | 185 | 57 | 475 | 0.12 |  | 0.1155 | 0.0013 | 5.2509 | 0.0554 | 0.3296 | 0.0059 |  | 1888 | 17 | 1861 | 9 | 1837 | 28 |
| T-1 54 | 74 | 142 | 155 | 0.91 |  | 0.1150 | 0.0018 | 5.3793 | 0.0767 | 0.3392 | 0.0065 |  | 1879 | 16 | 1882 | 12 | 1883 | 31 |
| T-1 57 | 145 | 99 | 358 | 0.28 |  | 0.1126 | 0.0013 | 5.1327 | 0.0541 | 0.3306 | 0.0059 |  | 1841 | 18 | 1842 | 9 | 1841 | 29 |
| T-1 58 | 58 | 90 | 129 | 0.69 |  | 0.1141 | 0.0017 | 5.2505 | 0.0726 | 0.3336 | 0.0064 |  | 1866 | 17 | 1861 | 12 | 1856 | 31 |
| T-1 60 | 98 | 52 | 245 | 0.21 |  | 0.1148 | 0.0015 | 5.2912 | 0.0617 | 0.3343 | 0.0061 |  | 1876 | 17 | 1867 | 10 | 1859 | 29 |
| T-1 61 | 168 | 69 | 434 | 0.16 |  | 0.1128 | 0.0025 | 4.9961 | 0.0652 | 0.3212 | 0.0057 |  | 1845 | 41 | 1819 | 11 | 1796 | 28 |
| T-1 62 | 137 | 142 | 395 | 0.36 |  | 0.1038 | 0.0028 | 3.7985 | 0.0754 | 0.2653 | 0.0049 |  | 1694 | 51 | 1592 | 16 | 1517 | 25 |
| T-1 63 | 186 | 239 | 480 | 0.50 |  | 0.1129 | 0.0013 | 4.6958 | 0.0474 | 0.3016 | 0.0053 |  | 1846 | 18 | 1766 | 8 | 1699 | 26 |
| T-2 06r | 103 | 76 | 265 | 0.29 |  | 0.1148 | 0.0008 | 5.3142 | 0.0333 | 0.3356 | 0.0031 |  | 1877 | 13 | 1871 | 5 | 1866 | 15 |
| T-2 07c | 297 | 511 | 495 | 1.03 |  | 0.1566 | 0.0009 | 9.3160 | 0.0479 | 0.4314 | 0.0039 |  | 2420 | 10 | 2370 | 5 | 2312 | 17 |
| T-2 09 | 102 | 75 | 263 | 0.28 |  | 0.1160 | 0.0009 | 5.4140 | 0.0394 | 0.3384 | 0.0033 |  | 1896 | 14 | 1887 | 6 | 1879 | 16 |
| T-2 15 | 87 | 60 | 235 | 0.26 |  | 0.1152 | 0.0009 | 5.3636 | 0.0371 | 0.3377 | 0.0032 |  | 1883 | 14 | 1879 | 6 | 1875 | 16 |
| T-2 16 | 130 | 84 | 349 | 0.24 |  | 0.1144 | 0.0009 | 5.2999 | 0.0355 | 0.3361 | 0.0032 |  | 1870 | 13 | 1869 | 6 | 1868 | 15 |
| T-2 17 | 130 | 80 | 339 | 0.24 |  | 0.1162 | 0.0010 | 5.4006 | 0.0403 | 0.3370 | 0.0033 |  | 1899 | 15 | 1885 | 6 | 1872 | 16 |
| T-2 18 | 148 | 122 | 460 | 0.27 |  | 0.1154 | 0.0013 | 5.3259 | 0.0566 | 0.3347 | 0.0038 |  | 1886 | 21 | 1873 | 9 | 1861 | 18 |
| T-2 21 | 147 | 106 | 406 | 0.26 |  | 0.1112 | 0.0027 | 4.4823 | 0.0706 | 0.2925 | 0.0053 |  | 1818 | 45 | 1728 | 13 | 1654 | 26 |
| T-2 23 | 85 | 189 | 324 | 0.58 |  | 0.0795 | 0.0011 | 2.2050 | 0.0287 | 0.2012 | 0.0037 |  | 1184 | 18 | 1183 | 9 | 1182 | 20 |
| T-2 25 | 91 | 75 | 224 | 0.33 |  | 0.1112 | 0.0014 | 4.9508 | 0.0579 | 0.3227 | 0.0059 |  | 1819 | 17 | 1811 | 10 | 1803 | 29 |
| T-2 26 | 87 | 97 | 209 | 0.47 |  | 0.1140 | 0.0016 | 5.0504 | 0.0649 | 0.3212 | 0.0060 |  | 1864 | 17 | 1828 | 11 | 1796 | 29 |
| T-2 27 | 76 | 46 | 191 | 0.24 |  | 0.1128 | 0.0016 | 5.0586 | 0.0643 | 0.3251 | 0.0061 |  | 1845 | 17 | 1829 | 11 | 1815 | 30 |
| T-2 28 | 110 | 52 | 274 | 0.19 |  | 0.1123 | 0.0014 | 5.0987 | 0.0579 | 0.3291 | 0.0060 |  | 1838 | 17 | 1836 | 10 | 1834 | 29 |
| T-2 31 | 68 | 46 | 167 | 0.28 |  | 0.1117 | 0.0016 | 5.0229 | 0.0656 | 0.3259 | 0.0061 |  | 1828 | 17 | 1823 | 11 | 1819 | 30 |
| T-2 32 | 132 | 68 | 323 | 0.21 |  | 0.1102 | 0.0013 | 4.9180 | 0.0516 | 0.3236 | 0.0058 |  | 1803 | 18 | 1805 | 9 | 1807 | 28 |

* r-rim, c-core.

Supplementary Table S2. Trace element data for zircon xenocrysts from the kimberlites in North Korea

| Sample No. | Th | U | Pb | La | Ce | Pr | Nd | Sm | Eu | Gd | Tb | Dy | Ho | Er | Tm | Yb | Lu | Y |
| --- | --- | --- | --- | --- | --- | --- | --- | --- | --- | --- | --- | --- | --- | --- | --- | --- | --- | --- |
| 11NK11 02 | 306 | 866 | 438 | 0.0 | 25 | 0.1 | 1.0 | 2.0 | 0.7 | 12 | 5 | 66 | 28 | 147 | 39 | 455 | 83 | 917 |
| 11NK11 03 | 169 | 280 | 119 | 1.6 | 8.6 | 0.9 | 7.4 | 10 | 0.4 | 40 | 15 | 168 | 60 | 246 | 53 | 482 | 70 | 1659 |
| 11NK11 04 | 49 | 190 | 73 | *b.d. | 1.1 | 0.1 | 1.5 | 4.1 | 0.1 | 21 | 7 | 63 | 19 | 70 | 14 | 126 | 18 | 531 |
| 11NK11 07 | 71 | 284 | 103 | 0.4 | 2.0 | 0.2 | 2.1 | 5.8 | 0.3 | 39 | 17 | 225 | 86 | 378 | 82 | 764 | 115 | 2415 |
| 11NK11 09 | 64 | 344 | 127 | b.d. | 0.8 | 0.0 | 0.9 | 3.6 | 0.1 | 24 | 12 | 163 | 63 | 278 | 62 | 587 | 88 | 1816 |
| 11NK11 10 | 100 | 823 | 293 | b.d. | 1.2 | 0.1 | 1.2 | 4.1 | 0.1 | 28 | 14 | 193 | 74 | 326 | 72 | 689 | 102 | 2113 |
| 11NK11 11 | 75 | 349 | 125 | b.d. | 1.1 | 0.1 | 1.5 | 5.0 | 0.0 | 31 | 14 | 180 | 68 | 287 | 64 | 603 | 88 | 1896 |
| 11NK11 12 | 100 | 375 | 141 | b.d. | 1.2 | 0.1 | 2.0 | 7.7 | 0.1 | 49 | 22 | 288 | 110 | 468 | 100 | 917 | 132 | 2984 |
| 11NK11 13c* | 202 | 421 | 168 | 0.1 | 3.0 | 0.4 | 6.7 | 13 | 0.3 | 63 | 24 | 282 | 101 | 430 | 92 | 867 | 126 | 2731 |
| 11NK11 14c | 190 | 564 | 277 | b.d. | 12 | 0.0 | 0.9 | 2.3 | 0.1 | 15 | 6 | 71 | 28 | 118 | 27 | 255 | 39 | 777 |
| 11NK11 15c | 56 | 297 | 113 | b.d. | 0.9 | 0.1 | 1.0 | 3.4 | 0.0 | 19 | 8 | 96 | 32 | 125 | 25 | 225 | 31 | 945 |
| 11NK11 17 | 64 | 475 | 181 | b.d. | 0.7 | 0.1 | 1.0 | 4.5 | 0.1 | 31 | 16 | 207 | 79 | 337 | 74 | 691 | 100 | 2203 |
| 11NK11 23 | 181 | 498 | 198 | 0.1 | 2.2 | 0.3 | 5.5 | 12 | 0.2 | 60 | 24 | 287 | 98 | 385 | 77 | 682 | 97 | 2720 |
| 11NK11 24 | 139 | 720 | 278 | b.d. | 3.7 | b.d. | 1.1 | 3.3 | 0.2 | 18 | 7 | 83 | 29 | 129 | 27 | 265 | 51 | 847 |
| 11NK11 26c | 137 | 272 | 117 | b.d. | 2.7 | 0.2 | 2.8 | 8.1 | b.d. | 41 | 15 | 189 | 74 | 330 | 67 | 608 | 108 | 2054 |
| 11NK11 27 | 147 | 152 | 72 | 0.7 | 4.6 | 0.4 | 4.7 | 9.5 | 0.3 | 44 | 15 | 183 | 74 | 336 | 68 | 612 | 109 | 2015 |
| 11NK11 29 | 95 | 390 | 147 | 0.1 | 1.6 | b.d. | 2.1 | 4.2 | b.d. | 30 | 13 | 169 | 65 | 287 | 57 | 507 | 90 | 1871 |
| 11NK11 31 | 147 | 401 | 162 | 0.5 | 4.7 | 0.7 | 6.9 | 6.8 | b.d. | 36 | 12 | 135 | 44 | 176 | 32 | 286 | 51 | 1270 |
| 11NK11 32c | 92 | 370 | 144 | b.d. | 1.5 | 0.1 | 2.1 | 7.2 | b.d. | 49 | 20 | 261 | 103 | 467 | 93 | 841 | 149 | 2970 |
| 11NK11 33 | 103 | 905 | 313 | 0.1 | 1.0 | b.d. | 1.1 | 4.5 | b.d. | 35 | 17 | 220 | 80 | 344 | 66 | 571 | 102 | 2395 |
| 11NK11 37 | 94 | 772 | 284 | 0.3 | 1.4 | 0.1 | 1.9 | 7.0 | b.d. | 47 | 21 | 265 | 96 | 402 | 76 | 685 | 121 | 2760 |
| 11NK11 39 | 87 | 604 | 227 | b.d. | 1.1 | 0.1 | 1.6 | 6.0 | b.d. | 35 | 16 | 185 | 63 | 261 | 50 | 425 | 74 | 1827 |
| 11NK11 44 | 176 | 589 | 229 | b.d. | 2.9 | b.d. | 2.9 | 7.1 | b.d. | 41 | 16 | 190 | 66 | 297 | 60 | 535 | 99 | 1893 |
| 11NK11 52 | 100 | 316 | 129 | 0.0 | 1.5 | 0.1 | 2.4 | 7.2 | 0.1 | 47 | 17 | 207 | 75 | 317 | 62 | 534 | 95 | 2111 |
| 11NK11 53 | 90 | 247 | 102 | b.d. | 1.6 | b.d. | 1.6 | 6.0 | b.d. | 36 | 14 | 176 | 70 | 298 | 60 | 544 | 98 | 1923 |
| 11NK11 57 | 83 | 281 | 106 | b.d. | 1.3 | b.d. | 2.5 | 7.7 | b.d. | 41 | 18 | 224 | 89 | 396 | 79 | 692 | 126 | 2613 |
| 11NK11 58 | 202 | 443 | 138 | 1.6 | 10 | 1.3 | 9.5 | 9.3 | b.d. | 33 | 12 | 142 | 54 | 235 | 47 | 424 | 79 | 1606 |
| 11NK11 59c | 79 | 357 | 150 | b.d. | 2.1 | b.d. | b.d. | 4.9 | b.d. | 35 | 14 | 183 | 72 | 318 | 65 | 595 | 112 | 2131 |
| 11NK11 60c | 86 | 287 | 130 | b.d. | 1.8 | b.d. | b.d. | 3.7 | b.d. | 19 | 7 | 94 | 37 | 161 | 33 | 312 | 59 | 1101 |
| 11NK11 61c | 201 | 497 | 246 | 0.4 | 11 | b.d. | 4.0 | 6.0 | 0.9 | 24 | 8 | 84 | 31 | 140 | 30 | 290 | 58 | 952 |
| 11NK12 03 | 86 | 231 | 18 | b.d. | 9.9 | b.d. | 1.1 | 3.4 | 1.4 | 23 | 9 | 114 | 44 | 196 | 45 | 469 | 79 | 1269 |
| 11NK12 04 | 86 | 378 | 28 | 5.4 | 72 | 5.8 | 41 | 21 | 4.3 | 44 | 12 | 121 | 43 | 184 | 45 | 475 | 80 | 1237 |
| 11NK12 05 | 28 | 491 | 36 | b.d. | 10 | 0.1 | 2.1 | 3.5 | 0.9 | 15 | 5 | 53 | 17 | 80 | 22 | 278 | 47 | 520 |
| 11NK13 01 | 40 | 207 | 79 | b.d. | 0.9 | 0.1 | 1.3 | 4.0 | b.d. | 26 | 12 | 167 | 64 | 279 | 61 | 585 | 85 | 1847 |
| 11NK13 05 | 46 | 190 | 71 | b.d. | 1.2 | 0.1 | 1.2 | 3.7 | 0.1 | 21 | 9 | 107 | 36 | 142 | 29 | 267 | 38 | 1048 |
| 11NK13 06 | 52 | 203 | 79 | 0.0 | 1.1 | 0.1 | 1.5 | 3.9 | 0.1 | 25 | 11 | 135 | 50 | 210 | 45 | 414 | 60 | 1450 |
| 11NK13 07 | 36 | 277 | 99 | b.d. | 0.6 | b.d. | 0.7 | 2.8 | 0.0 | 18 | 8 | 98 | 32 | 120 | 24 | 204 | 28 | 952 |
| 11NK13 10 | 145 | 245 | 99 | b.d. | 2.5 | 0.2 | 3.0 | 8.3 | 0.1 | 40 | 15 | 184 | 68 | 283 | 60 | 560 | 83 | 1898 |
| 11NK13 12 | 286 | 277 | 123 | 0.1 | 5.8 | 0.9 | 14 | 20 | 0.5 | 74 | 23 | 250 | 85 | 334 | 68 | 617 | 90 | 2285 |
| 11NK13 13 | 217 | 338 | 139 | b.d. | 4.5 | 0.3 | 4.5 | 8.2 | 0.2 | 38 | 14 | 155 | 54 | 223 | 47 | 421 | 64 | 1480 |
| 11NK13 15 | 65 | 403 | 145 | b.d. | 0.8 | 0.1 | 0.9 | 4.2 | 0.1 | 29 | 14 | 183 | 68 | 291 | 63 | 571 | 83 | 1976 |
| 11NK13 16 | 63 | 430 | 159 | 0.1 | 1.2 | 0.1 | 1.6 | 5.3 | 0.1 | 34 | 15 | 189 | 66 | 270 | 57 | 534 | 77 | 1924 |
| 11NK13 17 | 389 | 513 | 208 | 0.4 | 6.4 | 0.5 | 7.1 | 12 | 0.2 | 52 | 20 | 233 | 85 | 352 | 75 | 699 | 101 | 2297 |
| 11NK13 19 | 120 | 399 | 149 | 0.1 | 1.8 | 0.1 | 2.1 | 5.5 | 0.1 | 36 | 15 | 190 | 70 | 296 | 63 | 585 | 87 | 1954 |
| 11NK13 20 | 102 | 293 | 109 | b.d. | 1.7 | 0.2 | 3.0 | 8.3 | 0.2 | 46 | 19 | 238 | 90 | 378 | 80 | 735 | 106 | 2459 |
| 11NK13 22 | 84 | 592 | 229 | b.d. | 1.1 | b.d. | 1.4 | 5.5 | b.d. | 40 | 18 | 232 | 84 | 358 | 68 | 593 | 104 | 2420 |
| 11NK13 24 | 91 | 516 | 203 | b.d. | 1.3 | 0.1 | 2.6 | 8.2 | 0.1 | 56 | 24 | 296 | 110 | 479 | 92 | 794 | 141 | 3077 |
| 11NK13 32 | 172 | 195 | 90 | 0.3 | 5.0 | 0.3 | 4.2 | 8.1 | 0.2 | 38 | 12 | 134 | 48 | 206 | 39 | 351 | 65 | 1296 |
| 11NK13 35 | 317 | 508 | 224 | 0.0 | 2.5 | 0.2 | 3.9 | 13 | b.d. | 52 | 14 | 131 | 36 | 131 | 23 | 193 | 34 | 1012 |
| 11NK13 37 | 104 | 482 | 191 | b.d. | 1.6 | 0.1 | 1.4 | 6.1 | b.d. | 41 | 18 | 235 | 92 | 411 | 83 | 741 | 125 | 2547 |
| 11NK13 38 | 249 | 311 | 142 | 0.1 | 5.5 | 0.3 | 7.4 | 17 | b.d. | 81 | 27 | 305 | 107 | 451 | 84 | 722 | 126 | 2892 |
| 11NK13 39 | 71 | 520 | 199 | b.d. | 1.1 | 0.1 | 1.6 | 5.1 | 0.1 | 39 | 16 | 208 | 78 | 338 | 66 | 587 | 104 | 2237 |
| 11NK13 44 | 101 | 382 | 152 | b.d. | 2.7 | 0.2 | 2.7 | 4.7 | b.d. | 33 | 14 | 159 | 63 | 279 | 57 | 530 | 100 | 1723 |
| 11NK13 46 | 102 | 492 | 181 | b.d. | 1.9 | 0.1 | 1.6 | 4.9 | b.d. | 33 | 13 | 156 | 57 | 248 | 48 | 447 | 79 | 1618 |
| 11NK13 49 | 127 | 515 | 196 | b.d. | 1.6 | b.d. | 1.9 | 5.3 | b.d. | 37 | 15 | 193 | 71 | 312 | 61 | 529 | 93 | 2050 |
| 11NK13 52 | 295 | 532 | 212 | b.d. | 5.8 | 0.2 | 4.1 | 7.9 | b.d. | 46 | 15 | 177 | 64 | 272 | 52 | 467 | 85 | 1779 |
| 11NK13 58 | 76 | 277 | 115 | b.d. | 2.0 | b.d. | 1.9 | 4.4 | b.d. | 29 | 12 | 151 | 59 | 261 | 52 | 468 | 87 | 1943 |
| 11NK13 60 | 94 | 223 | 92 | b.d. | 2.1 | 0.2 | 2.0 | 5.6 | b.d. | 33 | 12 | 141 | 52 | 223 | 44 | 405 | 75 | 1726 |
| 11NK14 02 | 97 | 324 | 129 | 0.1 | 2.1 | 0.2 | 2.8 | 6.0 | 0.1 | 32 | 14 | 175 | 65 | 279 | 61 | 575 | 80 | 1803 |
| 11NK14 04 | 135 | 388 | 148 | 0.1 | 2.2 | 0.2 | 2.4 | 6.5 | 0.1 | 36 | 15 | 182 | 67 | 286 | 64 | 611 | 88 | 1844 |
| 11NK14 07 | 119 | 245 | 99 | 0.0 | 2.2 | 0.1 | 2.4 | 6.2 | 0.1 | 33 | 13 | 152 | 55 | 231 | 51 | 473 | 68 | 1558 |
| 11NK14 08 | 124 | 483 | 165 | 0.1 | 2.0 | 0.2 | 2.4 | 5.8 | 0.1 | 32 | 13 | 147 | 50 | 203 | 43 | 397 | 56 | 1391 |
| 11NK14 09 | 73 | 241 | 93 | b.d. | 1.3 | 0.1 | 1.9 | 6.1 | 0.1 | 38 | 16 | 201 | 75 | 319 | 69 | 645 | 92 | 2069 |
| 11NK14 13 | 59 | 313 | 113 | b.d. | 1.0 | 0.1 | 1.1 | 3.3 | 0.1 | 22 | 10 | 114 | 40 | 164 | 34 | 321 | 46 | 1158 |
| 11NK14 16 | 47 | 207 | 76 | b.d. | 1.0 | 0.1 | 1.4 | 4.0 | 0.1 | 23 | 9 | 113 | 40 | 164 | 35 | 324 | 46 | 1138 |
| 11NK14 17 | 57 | 340 | 123 | 0.6 | 3.1 | 0.4 | 3.2 | 3.4 | 0.2 | 19 | 9 | 120 | 44 | 186 | 40 | 376 | 56 | 1286 |
| 11NK14 20 | 77 | 362 | 116 | 0.5 | 2.2 | 0.2 | 1.7 | 4.4 | 0.1 | 28 | 13 | 170 | 64 | 282 | 62 | 594 | 84 | 1808 |
| 11NK14 21 | 68 | 91 | 52 | b.d. | 6.4 | 0.1 | 1.1 | 2.5 | 0.8 | 11 | 4 | 45 | 16 | 72 | 17 | 171 | 28 | 494 |
| 11NK14 22 | 52 | 351 | 124 | 0.0 | 0.9 | 0.0 | 0.8 | 3.5 | 0.1 | 22 | 9 | 111 | 36 | 129 | 25 | 208 | 28 | 1052 |
| 11NK14 23 | 50 | 238 | 85 | b.d. | 0.9 | 0.1 | 1.1 | 4.4 | 0.1 | 29 | 13 | 165 | 62 | 262 | 56 | 516 | 73 | 1766 |
| 11NK14 24 | 60 | 168 | 65 | b.d. | 1.3 | 0.1 | 1.3 | 4.3 | 0.1 | 23 | 8 | 77 | 24 | 93 | 20 | 203 | 30 | 666 |
| 11NK14 26 | 281 | 318 | 138 | 0.1 | 4.6 | 0.4 | 6.7 | 13 | 0.2 | 58 | 21 | 249 | 92 | 386 | 82 | 761 | 106 | 2419 |
| 11NK14 27 | 56 | 211 | 80 | 0.0 | 1.3 | 0.1 | 1.4 | 4.1 | 0.2 | 24 | 9 | 94 | 30 | 113 | 24 | 220 | 32 | 853 |
| 11NK14 28 | 133 | 433 | 133 | 0.9 | 4.5 | 0.5 | 5.2 | 11 | 1.1 | 60 | 24 | 284 | 103 | 427 | 89 | 809 | 117 | 2765 |
| 11NK14 29 | 77 | 217 | 83 | b.d. | 1.6 | 0.2 | 2.2 | 6.7 | 0.1 | 40 | 16 | 195 | 71 | 302 | 64 | 595 | 85 | 2036 |
| 11NK14 30 | 90 | 251 | 95 | 0.4 | 2.7 | 0.2 | 2.4 | 4.3 | 0.1 | 23 | 9 | 110 | 39 | 160 | 35 | 326 | 46 | 1126 |
| 11NK14 32 | 72 | 453 | 166 | 0.3 | 1.3 | 0.1 | 1.8 | 5.9 | 0.1 | 41 | 18 | 225 | 77 | 318 | 66 | 603 | 86 | 2212 |
| 11NK14 34 | 80 | 227 | 98 | b.d. | 1.5 | 0.2 | 2.2 | 6.4 | 0.1 | 37 | 14 | 166 | 66 | 287 | 57 | 511 | 93 | 1862 |
| 11NK14 36 | 95 | 373 | 146 | 0.0 | 1.4 | 0.1 | 2.1 | 4.5 | b.d. | 33 | 14 | 175 | 68 | 306 | 62 | 543 | 102 | 2015 |
| 11NK14 40 | 79 | 353 | 132 | b.d. | 1.1 | b.d. | 1.2 | 4.2 | b.d. | 26 | 10 | 120 | 41 | 165 | 31 | 263 | 45 | 1203 |
| 11NK14 42 | 126 | 448 | 162 | b.d. | 2.4 | b.d. | 3.1 | 6.6 | 0.1 | 42 | 18 | 223 | 86 | 381 | 76 | 678 | 122 | 2464 |
| 11NK14 43 | 79 | 223 | 91 | b.d. | 1.7 | 0.1 | 2.2 | 4.3 | b.d. | 36 | 13 | 166 | 64 | 283 | 56 | 506 | 92 | 1786 |
| 11NK14 44 | 166 | 421 | 166 | 0.2 | 2.9 | b.d. | 2.8 | 5.7 | b.d. | 31 | 12 | 134 | 46 | 185 | 36 | 312 | 52 | 1311 |
| 11NK14 45 | 80 | 337 | 134 | 0.0 | 1.3 | b.d. | 2.4 | 6.6 | b.d. | 44 | 19 | 242 | 98 | 440 | 87 | 792 | 141 | 2811 |
| 11NK14 46 | 104 | 373 | 140 | b.d. | 1.6 | b.d. | 1.4 | 5.7 | b.d. | 37 | 16 | 197 | 77 | 337 | 68 | 606 | 109 | 2230 |
| 11NK14 48 | 281 | 267 | 125 | b.d. | 5.5 | 0.6 | 7.7 | 12 | 0.4 | 49 | 16 | 173 | 61 | 252 | 46 | 399 | 71 | 1675 |
| 11NK14 51 | 200 | 561 | 224 | b.d. | 3.1 | 0.3 | 5.1 | 12 | b.d. | 63 | 22 | 246 | 89 | 372 | 72 | 641 | 115 | 2506 |
| 11NK14 52 | 96 | 572 | 212 | b.d. | 1.2 | b.d. | 2.0 | 7.2 | 0.2 | 44 | 19 | 229 | 83 | 336 | 65 | 562 | 100 | 2390 |
| 11NK14 53 | 105 | 363 | 134 | b.d. | 1.5 | b.d. | 1.5 | 4.5 | b.d. | 31 | 13 | 163 | 61 | 265 | 55 | 501 | 90 | 1777 |
| 11NK14 54 | 73 | 334 | 132 | b.d. | 1.2 | 0.1 | 1.4 | 3.8 | b.d. | 26 | 11 | 143 | 56 | 254 | 53 | 491 | 91 | 1650 |
| 11NK14 55 | 64 | 469 | 181 | b.d. | 0.7 | b.d. | 1.1 | 4.1 | 0.1 | 31 | 14 | 164 | 57 | 229 | 43 | 373 | 64 | 1719 |
| 11NK14 57 | 214 | 507 | 210 | 0.0 | 3.9 | 0.2 | 2.7 | 6.3 | 0.2 | 34 | 12 | 146 | 52 | 224 | 45 | 405 | 72 | 1527 |
| 11NK14 58 | 72 | 211 | 87 | 0.1 | 1.5 | b.d. | 2.0 | 4.1 | b.d. | 31 | 11 | 132 | 46 | 199 | 40 | 363 | 66 | 1353 |
| 11NK14 62 | 56 | 209 | 79 | b.d. | 1.2 | b.d. | 1.3 | 4.2 | b.d. | 28 | 12 | 144 | 55 | 244 | 48 | 443 | 78 | 1598 |
| T-1 01 | 78 | 178 | 73 | b.d. | 1.7 | 0.1 | 2.3 | 5.7 | 0.1 | 32 | 12 | 141 | 50 | 205 | 44 | 419 | 57 | 1373 |
| T-1 02 | 71 | 307 | 111 | 0.1 | 1.2 | 0.1 | 1.7 | 4.5 | 0.1 | 28 | 12 | 149 | 54 | 227 | 49 | 463 | 64 | 1551 |
| T-1 04 | 49 | 413 | 152 | b.d. | 0.6 | 0.0 | 0.7 | 3.7 | 0.1 | 24 | 12 | 146 | 52 | 207 | 44 | 411 | 57 | 1510 |
| T-1 07 | 75 | 309 | 118 | b.d. | 1.1 | 0.1 | 1.4 | 5.1 | 0.1 | 30 | 13 | 148 | 52 | 209 | 43 | 396 | 54 | 1458 |
| T-1 09 | 56 | 278 | 97 | 0.1 | 1.0 | 0.1 | 1.1 | 3.2 | 0.1 | 19 | 9 | 109 | 39 | 161 | 36 | 346 | 52 | 1171 |
| T-1 10 | 48 | 346 | 122 | b.d. | 0.7 | 0.0 | 0.8 | 2.7 | 0.0 | 19 | 9 | 106 | 35 | 135 | 28 | 250 | 36 | 1076 |
| T-1 11 | 45 | 369 | 134 | b.d. | 0.5 | 0.0 | 0.7 | 2.3 | 0.1 | 17 | 8 | 110 | 41 | 169 | 37 | 346 | 51 | 1231 |
| T-1 13 | 42 | 197 | 74 | b.d. | 0.8 | 0.0 | 0.8 | 2.8 | b.d. | 19 | 8 | 102 | 36 | 145 | 29 | 253 | 34 | 1099 |
| T-1 15 | 246 | 303 | 173 | b.d. | 31.2 | 0.2 | 3.0 | 4.9 | 1.0 | 22 | 7 | 81 | 27 | 113 | 25 | 238 | 35 | 819 |
| T-1 16 | 54 | 325 | 115 | b.d. | 0.8 | 0.0 | 1.2 | 3.3 | 0.1 | 22 | 10 | 126 | 46 | 188 | 41 | 385 | 54 | 1352 |
| T-1 19 | 39 | 139 | 55 | b.d. | 1.0 | 0.1 | 0.9 | 3.2 | 0.1 | 18 | 7 | 86 | 30 | 119 | 24 | 221 | 31 | 884 |
| T-1 21 | 186 | 357 | 126 | 0.1 | 2.7 | 0.2 | 3.6 | 7.0 | 0.1 | 34 | 13 | 153 | 55 | 223 | 47 | 437 | 63 | 1603 |
| T-1 22 | 70 | 227 | 89 | b.d. | 1.1 | 0.1 | 1.2 | 3.3 | 0.0 | 20 | 8 | 104 | 39 | 172 | 38 | 378 | 59 | 1158 |
| T-1 28 | 57 | 211 | 82 | b.d. | 1.0 | 0.1 | 1.5 | 4.4 | 0.1 | 29 | 12 | 160 | 59 | 251 | 54 | 499 | 73 | 1720 |
| T-1 29 | 54 | 200 | 78 | b.d. | 0.9 | 0.1 | 1.2 | 3.2 | 0.0 | 20 | 8 | 94 | 30 | 112 | 22 | 195 | 29 | 898 |
| T-1 31 | 156 | 284 | 112 | b.d. | 3.0 | 0.1 | 1.8 | 3.8 | b.d. | 22 | 8 | 99 | 39 | 176 | 36 | 336 | 62 | 1163 |
| T-1 34 | 76 | 489 | 185 | b.d. | 0.9 | 0.1 | 1.2 | 4.3 | b.d. | 36 | 15 | 176 | 58 | 223 | 40 | 327 | 54 | 1736 |
| T-1 36 | 119 | 271 | 106 | b.d. | 1.8 | 0.1 | 2.4 | 5.8 | 0.1 | 33 | 12 | 144 | 54 | 219 | 40 | 336 | 58 | 1523 |
| T-1 37 | 75 | 343 | 140 | b.d. | 1.3 | b.d. | 1.2 | 4.6 | 0.0 | 32 | 13 | 172 | 68 | 296 | 60 | 537 | 98 | 1983 |
| T-1 49 | 155 | 201 | 107 | 1.3 | 21 | 0.5 | 2.4 | b.d. | 0.5 | 6 | 2 | 26 | 10 | 52 | 12 | 136 | 30 | 330 |
| T-1 51 | 57 | 475 | 185 | b.d. | 0.6 | b.d. | 1.3 | 4.5 | b.d. | 30 | 12 | 144 | 46 | 173 | 31 | 257 | 43 | 1387 |
| T-1 54 | 142 | 155 | 74 | 0.0 | 3.1 | 0.4 | 6.1 | 9.1 | b.d. | 44 | 13 | 154 | 57 | 243 | 47 | 432 | 77 | 1580 |
| T-1 57 | 99 | 358 | 145 | b.d. | 1.4 | 0.1 | 2.1 | 7.1 | 0.2 | 46 | 18 | 207 | 71 | 284 | 53 | 442 | 75 | 2067 |
| T-1 58 | 90 | 129 | 58 | b.d. | 18 | 0.7 | 8.2 | 11 | 1.1 | 35 | 10 | 106 | 36 | 152 | 31 | 282 | 52 | 986 |
| T-1 60 | 52 | 245 | 98 | 3.5 | 6.8 | 0.7 | 4.2 | 4.1 | b.d. | 27 | 10 | 130 | 47 | 206 | 41 | 377 | 68 | 1399 |
| T-1 61 | 69 | 434 | 168 | b.d. | 1.3 | 0.1 | 1.4 | 6.2 | b.d. | 40 | 17 | 219 | 83 | 357 | 71 | 636 | 116 | 2407 |
| T-1 62 | 142 | 395 | 137 | b.d. | 2.7 | 0.2 | 3.8 | 7.7 | 0.3 | 42 | 15 | 162 | 55 | 214 | 40 | 355 | 62 | 1576 |
| T-1 63 | 239 | 480 | 186 | 0.2 | 3.0 | 0.2 | 2.5 | 5.0 | 0.1 | 29 | 11 | 140 | 55 | 247 | 50 | 473 | 87 | 1595 |
| T-2 06r | 76 | 265 | 103 | b.d. | 1.3 | 0.1 | 1.3 | 4.4 | 0.1 | 27 | 11 | 140 | 51 | 211 | 46 | 440 | 62 | 1431 |
| T-2 07c | 511 | 495 | 297 | 0.1 | 57 | 0.3 | 4.7 | 7.6 | 2.3 | 26 | 8 | 86 | 29 | 119 | 27 | 265 | 39 | 847 |
| T-2 09 | 75 | 263 | 102 | 0.1 | 1.7 | 0.1 | 2.1 | 5.3 | 0.2 | 32 | 13 | 156 | 54 | 215 | 44 | 403 | 56 | 1517 |
| T-2 15 | 60 | 235 | 87 | 0.0 | 1.2 | 0.1 | 1.3 | 4.0 | 0.1 | 26 | 10 | 116 | 37 | 136 | 26 | 233 | 31 | 1052 |
| T-2 16 | 84 | 349 | 130 | b.d. | 1.1 | 0.1 | 2.4 | 7.0 | 0.1 | 45 | 20 | 253 | 93 | 393 | 83 | 767 | 109 | 2499 |
| T-2 17 | 80 | 339 | 130 | 1.8 | 4.6 | 0.5 | 4.1 | 7.3 | 0.2 | 45 | 20 | 253 | 96 | 405 | 86 | 800 | 117 | 2553 |
| T-2 18 | 122 | 460 | 148 | b.d. | 1.6 | 0.1 | 1.1 | 4.4 | 0.1 | 27 | 13 | 171 | 66 | 287 | 66 | 639 | 89 | 1793 |
| T-2 21 | 106 | 406 | 147 | 0.1 | 2.4 | 0.1 | 2.1 | 5.3 | b.d. | 31 | 13 | 156 | 57 | 242 | 47 | 415 | 73 | 1685 |
| T-2 23 | 189 | 324 | 85 | 0.0 | 18 | 0.1 | 1.0 | 1.9 | 0.3 | 12 | 5 | 59 | 23 | 107 | 23 | 231 | 44 | 673 |
| T-2 25 | 75 | 224 | 91 | b.d. | 2.0 | 0.2 | 2.5 | 5.7 | b.d. | 29 | 11 | 129 | 48 | 209 | 40 | 372 | 68 | 1411 |
| T-2 26 | 97 | 209 | 87 | b.d. | 1.8 | b.d. | 2.9 | 6.8 | b.d. | 41 | 14 | 166 | 64 | 268 | 53 | 482 | 87 | 1781 |
| T-2 27 | 46 | 191 | 76 | 0.0 | 1.5 | b.d. | 1.2 | 3.6 | 0.1 | 20 | 8 | 90 | 32 | 131 | 26 | 228 | 41 | 937 |
| T-2 28 | 52 | 274 | 110 | 0.0 | 0.9 | 0.1 | 1.4 | 3.6 | b.d. | 32 | 14 | 179 | 69 | 305 | 61 | 543 | 99 | 2042 |
| T-2 31 | 46 | 167 | 68 | b.d. | 1.2 | b.d. | 1.1 | 3.2 | b.d. | 19 | 7 | 76 | 27 | 110 | 21 | 182 | 32 | 798 |
| T-2 32 | 68 | 323 | 132 | 0.3 | 1.4 | 0.1 | 1.9 | 5.4 | b.d. | 33 | 15 | 192 | 75 | 339 | 67 | 596 | 105 | 2249 |

* rb-rim, c-core; b.d.-below detection.

Supplementary Table S3. Lu-Hf isotopic compositions of zircon xenocrysts from the kimberlites in North Korea

| Sample No. | Age (Ma) | ±1σ | *Disc.% | 176Yb/177Hf | 176Lu/177Hf | 176Hf/177Hf | 2σ | 176Hf/177Hf n. | *εHf(t) | 2σ | *TDM (Ma) | *TCDM (Ma) |
| --- | --- | --- | --- | --- | --- | --- | --- | --- | --- | --- | --- | --- |
| 11NK11 02 | 2402 | 11 | 0 | 0.0301 | 0.0012 | 0.281196 | 0.000022 | 0.281143 | -3.8 | 0.8 | 2875 | 3187 |
| 11NK11 03 | 1893 | 27 | 3 | 0.0432 | 0.0013 | 0.281583 | 0.000023 | 0.281538 | -1.4 | 0.8 | 2352 | 2645 |
| 11NK11 04 | 1892 | 15 | 0 | 0.0093 | 0.0003 | 0.281439 | 0.000022 | 0.281428 | -5.3 | 0.8 | 2487 | 2892 |
| 11NK11 09 | 1870 | 17 | 2 | 0.0374 | 0.0012 | 0.281547 | 0.000019 | 0.281505 | -3.1 | 0.7 | 2396 | 2734 |
| 11NK11 10 | 1901 | 11 | 6 | 0.0537 | 0.0017 | 0.281549 | 0.000021 | 0.281487 | -3.0 | 0.7 | 2428 | 2754 |
| 11NK11 11 | 1900 | 15 | 5 | 0.0349 | 0.0011 | 0.281495 | 0.000020 | 0.281455 | -4.2 | 0.7 | 2462 | 2826 |
| 11NK11 12 | 1888 | 15 | 0 | 0.0427 | 0.0013 | 0.281516 | 0.000021 | 0.281468 | -4.0 | 0.7 | 2449 | 2805 |
| 11NK11 13c | 1897 | 12 | 0 | 0.0555 | 0.0017 | 0.281545 | 0.000023 | 0.281481 | -3.3 | 0.8 | 2436 | 2769 |
| 11NK11 14c | 2300 | 14 | 1 | 0.0159 | 0.0005 | 0.281229 | 0.000020 | 0.281206 | -3.9 | 0.7 | 2784 | 3115 |
| 11NK11 15c | 1901 | 13 | 0 | 0.0119 | 0.0003 | 0.281380 | 0.000020 | 0.281367 | -7.3 | 0.7 | 2570 | 3023 |
| 11NK11 17 | 1896 | 11 | 0 | 0.0365 | 0.0011 | 0.281487 | 0.000018 | 0.281447 | -4.6 | 0.7 | 2475 | 2849 |
| 11NK11 23 | 1877 | 14 | 0 | 0.0385 | 0.0012 | 0.281535 | 0.000020 | 0.281494 | -3.4 | 0.7 | 2412 | 2756 |
| 11NK11 24 | 1842 | 18 | 0 | 0.0170 | 0.0006 | 0.281402 | 0.000015 | 0.281382 | -8.1 | 0.5 | 2554 | 3029 |
| 11NK11 26c | 1868 | 17 | -1 | 0.0483 | 0.0014 | 0.281488 | 0.000015 | 0.281437 | -5.5 | 0.5 | 2493 | 2888 |
| 11NK11 27 | 1837 | 17 | -1 | 0.0379 | 0.0012 | 0.281476 | 0.000015 | 0.281435 | -6.3 | 0.5 | 2493 | 2913 |
| 11NK11 29 | 1885 | 18 | 5 | 0.0264 | 0.0008 | 0.281494 | 0.000015 | 0.281466 | -4.2 | 0.5 | 2444 | 2813 |
| 11NK11 31 | 1855 | 18 | 1 | 0.0182 | 0.0005 | 0.281517 | 0.000014 | 0.281498 | -3.7 | 0.5 | 2397 | 2759 |
| 11NK11 32c | 1878 | 18 | 3 | 0.0511 | 0.0015 | 0.281541 | 0.000016 | 0.281488 | -3.5 | 0.6 | 2424 | 2767 |
| 11NK11 33 | 1835 | 19 | 8 | 0.0462 | 0.0012 | 0.281503 | 0.000014 | 0.281459 | -5.5 | 0.5 | 2462 | 2861 |
| 11NK11 37 | 1870 | 18 | 5 | 0.0292 | 0.0009 | 0.281499 | 0.000017 | 0.281468 | -4.4 | 0.6 | 2443 | 2818 |
| 11NK11 39 | 1875 | 18 | 3 | 0.0273 | 0.0008 | 0.281484 | 0.000014 | 0.281455 | -4.8 | 0.5 | 2459 | 2843 |
| 11NK11 44 | 1881 | 18 | 4 | 0.0330 | 0.0010 | 0.281466 | 0.000015 | 0.281431 | -5.5 | 0.5 | 2494 | 2893 |
| 11NK11 52 | 1903 | 17 | 2 | 0.0219 | 0.0006 | 0.281502 | 0.000013 | 0.281479 | -3.3 | 0.5 | 2423 | 2770 |
| 11NK11 57 | 1876 | 23 | 5 | 0.0319 | 0.0010 | 0.281502 | 0.000013 | 0.281465 | -4.4 | 0.5 | 2449 | 2821 |
| 11NK11 58 | 1917 | 32 | 10 | 0.0274 | 0.0008 | 0.281475 | 0.000014 | 0.281446 | -4.1 | 0.5 | 2471 | 2836 |
| 11NK11 59c | 1918 | 33 | 1 | 0.0555 | 0.0016 | 0.281527 | 0.000016 | 0.281468 | -3.3 | 0.6 | 2452 | 2786 |
| 11NK11 60c | 1934 | 31 | 3 | 0.0239 | 0.0007 | 0.281479 | 0.000015 | 0.281454 | -3.5 | 0.5 | 2458 | 2807 |
| 11NK11 61c | 2151 | 22 | -1 | 0.0134 | 0.0005 | 0.281390 | 0.000017 | 0.281371 | -1.4 | 0.6 | 2564 | 2845 |
| 11NK12 03 | 461 | 6 | 1 | 0.0413 | 0.0015 | 0.282932 | 0.000031 | 0.282919 | 15.3 | 1.1 | 460 | 460 |
| 11NK12 04 | 466 | 8 | 6 | 0.0362 | 0.0013 | 0.282793 | 0.000038 | 0.282781 | 10.6 | 1.3 | 657 | 771 |
| 11NK12 05 | 462 | 6 | 4 | 0.0108 | 0.0004 | 0.282389 | 0.000041 | 0.282386 | -3.5 | 1.4 | 1200 | 1665 |
| 11NK13 01 | 1889 | 19 | 0 | 0.0362 | 0.0011 | 0.281518 | 0.000020 | 0.281477 | -3.6 | 0.7 | 2433 | 2784 |
| 11NK13 05 | 1890 | 21 | 0 | 0.0184 | 0.0006 | 0.281467 | 0.000020 | 0.281447 | -4.7 | 0.7 | 2467 | 2852 |
| 11NK13 06 | 1881 | 14 | 1 | 0.0361 | 0.0011 | 0.281502 | 0.000020 | 0.281461 | -4.4 | 0.7 | 2455 | 2825 |
| 11NK13 07 | 1872 | 19 | 0 | 0.0222 | 0.0007 | 0.281511 | 0.000021 | 0.281487 | -3.7 | 0.7 | 2414 | 2774 |
| 11NK13 10 | 1914 | 20 | 4 | 0.0351 | 0.0011 | 0.281517 | 0.000023 | 0.281477 | -3.1 | 0.8 | 2433 | 2769 |
| 11NK13 12 | 1871 | 18 | 0 | 0.0372 | 0.0011 | 0.281523 | 0.000022 | 0.281482 | -3.9 | 0.8 | 2428 | 2786 |
| 11NK13 13 | 1876 | 16 | 1 | 0.0470 | 0.0015 | 0.281602 | 0.000020 | 0.281550 | -1.4 | 0.7 | 2338 | 2630 |
| 11NK13 16 | 1877 | 12 | 0 | 0.0393 | 0.0012 | 0.281532 | 0.000019 | 0.281489 | -3.5 | 0.7 | 2419 | 2766 |
| 11NK13 17 | 1894 | 12 | 6 | 0.0465 | 0.0015 | 0.281529 | 0.000019 | 0.281476 | -3.6 | 0.7 | 2439 | 2783 |
| 11NK13 19 | 1863 | 16 | 1 | 0.0478 | 0.0015 | 0.281543 | 0.000021 | 0.281490 | -3.8 | 0.8 | 2422 | 2773 |
| 11NK13 20 | 1896 | 21 | 0 | 0.0396 | 0.0013 | 0.281426 | 0.000022 | 0.281381 | -6.9 | 0.8 | 2567 | 2995 |
| 11NK13 22 | 1886 | 19 | 1 | 0.0401 | 0.0011 | 0.281499 | 0.000015 | 0.281459 | -4.4 | 0.5 | 2458 | 2827 |
| 11NK13 24 | 1881 | 19 | 0 | 0.0159 | 0.0005 | 0.281491 | 0.000017 | 0.281475 | -3.9 | 0.6 | 2427 | 2795 |
| 11NK13 32 | 1885 | 17 | 3 | 0.0232 | 0.0007 | 0.281492 | 0.000014 | 0.281465 | -4.2 | 0.5 | 2444 | 2814 |
| 11NK13 35 | 1913 | 17 | 1 | 0.0146 | 0.0005 | 0.281405 | 0.000014 | 0.281388 | -6.3 | 0.5 | 2543 | 2968 |
| 11NK13 37 | 1888 | 17 | 1 | 0.0461 | 0.0015 | 0.281555 | 0.000016 | 0.281500 | -2.9 | 0.6 | 2407 | 2733 |
| 11NK13 38 | 1888 | 17 | 1 | 0.0374 | 0.0011 | 0.281477 | 0.000017 | 0.281436 | -5.1 | 0.6 | 2489 | 2877 |
| 11NK13 39 | 1875 | 18 | 2 | 0.0295 | 0.0010 | 0.281489 | 0.000013 | 0.281455 | -4.8 | 0.5 | 2462 | 2845 |
| 11NK13 44 | 1885 | 17 | 1 | 0.0358 | 0.0011 | 0.281491 | 0.000016 | 0.281452 | -4.6 | 0.6 | 2467 | 2842 |
| 11NK13 46 | 1805 | 50 | 6 | 0.0138 | 0.0004 | 0.281453 | 0.000013 | 0.281439 | -6.9 | 0.5 | 2476 | 2927 |
| 11NK13 49 | 1878 | 45 | 5 | 0.0383 | 0.0011 | 0.281517 | 0.000015 | 0.281480 | -3.8 | 0.5 | 2429 | 2786 |
| 11NK13 52 | 1905 | 18 | 9 | 0.0307 | 0.0009 | 0.281478 | 0.000014 | 0.281444 | -4.5 | 0.5 | 2475 | 2847 |
| 11NK13 58 | 1902 | 26 | 0 | 0.0449 | 0.0014 | 0.281505 | 0.000016 | 0.281453 | -4.2 | 0.6 | 2471 | 2829 |
| 11NK13 60 | 1908 | 22 | 1 | 0.0272 | 0.0010 | 0.281464 | 0.000016 | 0.281429 | -4.9 | 0.6 | 2496 | 2879 |
| 11NK14 02 | 1888 | 12 | 0 | 0.0478 | 0.0015 | 0.281477 | 0.000024 | 0.281424 | -5.6 | 0.8 | 2513 | 2905 |
| 11NK14 04 | 1889 | 17 | 3 | 0.0404 | 0.0013 | 0.281535 | 0.000024 | 0.281488 | -3.3 | 0.8 | 2421 | 2760 |
| 11NK14 07 | 1892 | 14 | 0 | 0.0401 | 0.0012 | 0.281522 | 0.000022 | 0.281477 | -3.6 | 0.8 | 2435 | 2782 |
| 11NK14 08 | 1884 | 16 | 3 | 0.0441 | 0.0014 | 0.281512 | 0.000022 | 0.281463 | -4.3 | 0.8 | 2456 | 2819 |
| 11NK14 09 | 1896 | 16 | 1 | 0.0411 | 0.0013 | 0.281565 | 0.000025 | 0.281520 | -2.0 | 0.9 | 2376 | 2683 |
| 11NK14 16 | 1888 | 21 | 2 | 0.0285 | 0.0009 | 0.281502 | 0.000021 | 0.281469 | -4.0 | 0.8 | 2442 | 2803 |
| 11NK14 17 | 1899 | 14 | 7 | 0.0377 | 0.0012 | 0.281490 | 0.000020 | 0.281447 | -4.5 | 0.7 | 2476 | 2846 |
| 11NK14 21 | 2404 | 23 | 0 | 0.0137 | 0.0005 | 0.281291 | 0.000024 | 0.281268 | 0.7 | 0.9 | 2699 | 2902 |
| 11NK14 22 | 1884 | 17 | 2 | 0.0210 | 0.0006 | 0.281463 | 0.000020 | 0.281441 | -5.1 | 0.7 | 2475 | 2869 |
| 11NK14 23 | 1880 | 18 | 6 | 0.0500 | 0.0016 | 0.281529 | 0.000022 | 0.281473 | -4.0 | 0.8 | 2446 | 2800 |
| 11NK14 24 | 1876 | 16 | 0 | 0.0162 | 0.0005 | 0.281506 | 0.000020 | 0.281488 | -3.6 | 0.7 | 2410 | 2768 |
| 11NK14 26 | 1999 | 15 | 7 | 0.0584 | 0.0018 | 0.281532 | 0.000023 | 0.281463 | -1.6 | 0.8 | 2458 | 2742 |
| 11NK14 27 | 1871 | 15 | 0 | 0.0213 | 0.0007 | 0.281486 | 0.000023 | 0.281462 | -4.6 | 0.8 | 2447 | 2830 |
| 11NK14 28 | 1913 | 15 | 8 | 0.0478 | 0.0015 | 0.281566 | 0.000023 | 0.281513 | -1.8 | 0.8 | 2388 | 2687 |
| 11NK14 29 | 1901 | 15 | 6 | 0.0336 | 0.0010 | 0.281485 | 0.000022 | 0.281448 | -4.4 | 0.8 | 2472 | 2842 |
| 11NK14 30 | 1871 | 19 | 2 | 0.0304 | 0.0009 | 0.281499 | 0.000022 | 0.281466 | -4.5 | 0.8 | 2447 | 2822 |
| 11NK14 32 | 1874 | 12 | 1 | 0.0335 | 0.0011 | 0.281569 | 0.000031 | 0.281531 | -2.1 | 1.1 | 2359 | 2673 |
| 11NK14 34 | 1939 | 17 | 1 | 0.0263 | 0.0009 | 0.281488 | 0.000015 | 0.281456 | -3.3 | 0.5 | 2458 | 2799 |
| 11NK14 36 | 1838 | 18 | 1 | 0.0378 | 0.0012 | 0.281452 | 0.000017 | 0.281409 | -7.2 | 0.6 | 2531 | 2972 |
| 11NK14 40 | 1862 | 17 | 5 | 0.0250 | 0.0009 | 0.281479 | 0.000013 | 0.281448 | -5.3 | 0.5 | 2470 | 2867 |
| 11NK14 42 | 1884 | 18 | 10 | 0.0462 | 0.0014 | 0.281515 | 0.000015 | 0.281464 | -4.2 | 0.5 | 2456 | 2817 |
| 11NK14 43 | 1839 | 17 | 0 | 0.0210 | 0.0007 | 0.281443 | 0.000012 | 0.281420 | -6.8 | 0.4 | 2505 | 2946 |
| 11NK14 45 | 1850 | 18 | 0 | 0.0382 | 0.0014 | 0.281419 | 0.000021 | 0.281371 | -8.3 | 0.7 | 2585 | 3049 |
| 11NK14 46 | 1851 | 18 | 5 | 0.0230 | 0.0007 | 0.281495 | 0.000014 | 0.281469 | -4.8 | 0.5 | 2439 | 2828 |
| 11NK14 48 | 1871 | 17 | 3 | 0.0182 | 0.0005 | 0.281436 | 0.000016 | 0.281417 | -6.2 | 0.6 | 2507 | 2932 |
| 11NK14 51 | 1852 | 18 | 2 | 0.0256 | 0.0009 | 0.281453 | 0.000017 | 0.281423 | -6.4 | 0.6 | 2505 | 2932 |
| 11NK14 52 | 1886 | 18 | 7 | 0.0338 | 0.0010 | 0.281489 | 0.000014 | 0.281452 | -4.6 | 0.5 | 2467 | 2844 |
| 11NK14 53 | 1878 | 18 | 9 | 0.0314 | 0.0011 | 0.281501 | 0.000015 | 0.281463 | -4.4 | 0.5 | 2453 | 2824 |
| 11NK14 54 | 1833 | 18 | -1 | 0.0236 | 0.0008 | 0.281420 | 0.000014 | 0.281393 | -7.9 | 0.5 | 2544 | 3011 |
| 11NK14 55 | 1837 | 18 | 0 | 0.0336 | 0.0011 | 0.281484 | 0.000016 | 0.281447 | -5.9 | 0.6 | 2475 | 2887 |
| 11NK14 57 | 1861 | 18 | 1 | 0.0297 | 0.0010 | 0.281475 | 0.000015 | 0.281440 | -5.6 | 0.5 | 2483 | 2886 |
| 11NK14 58 | 1852 | 17 | -1 | 0.0279 | 0.0010 | 0.281474 | 0.000013 | 0.281439 | -5.8 | 0.5 | 2484 | 2894 |
| 11NK14 62 | 1856 | 17 | 5 | 0.0170 | 0.0006 | 0.281476 | 0.000016 | 0.281456 | -5.2 | 0.6 | 2455 | 2854 |
| T-1 01 | 1879 | 15 | 0 | 0.0248 | 0.0008 | 0.281509 | 0.000023 | 0.281482 | -3.7 | 0.8 | 2421 | 2779 |
| T-1 07 | 1884 | 16 | 2 | 0.0277 | 0.0008 | 0.281496 | 0.000023 | 0.281466 | -4.2 | 0.8 | 2445 | 2813 |
| T-1 09 | 1887 | 14 | 8 | 0.0273 | 0.0009 | 0.281497 | 0.000020 | 0.281466 | -4.1 | 0.7 | 2445 | 2810 |
| T-1 10 | 1896 | 17 | 0 | 0.0286 | 0.0009 | 0.281520 | 0.000020 | 0.281487 | -3.1 | 0.7 | 2416 | 2757 |
| T-1 13 | 1889 | 18 | 2 | 0.0205 | 0.0006 | 0.281471 | 0.000020 | 0.281449 | -4.7 | 0.7 | 2464 | 2847 |
| T-1 15 | 2442 | 12 | 0 | 0.0221 | 0.0007 | 0.280996 | 0.000024 | 0.280963 | -9.3 | 0.9 | 3111 | 3565 |
| T-1 16 | 1882 | 12 | 6 | 0.0428 | 0.0013 | 0.281520 | 0.000023 | 0.281473 | -4.0 | 0.8 | 2441 | 2797 |
| T-1 19 | 1883 | 14 | 1 | 0.0169 | 0.0005 | 0.281435 | 0.000020 | 0.281417 | -6.0 | 0.7 | 2506 | 2924 |
| T-1 21 | 1853 | 13 | 10 | 0.0416 | 0.0013 | 0.281530 | 0.000025 | 0.281485 | -4.2 | 0.9 | 2425 | 2790 |
| T-1 22 | 1899 | 14 | 0 | 0.0387 | 0.0012 | 0.281560 | 0.000022 | 0.281515 | -2.1 | 0.8 | 2382 | 2692 |
| T-1 28 | 1879 | 14 | 0 | 0.0448 | 0.0014 | 0.281490 | 0.000024 | 0.281441 | -5.2 | 0.9 | 2487 | 2871 |
| T-1 29 | 1884 | 13 | 0 | 0.0212 | 0.0007 | 0.281534 | 0.000021 | 0.281510 | -2.6 | 0.7 | 2382 | 2713 |
| T-1 31 | 1821 | 17 | 4 | 0.0298 | 0.0009 | 0.281491 | 0.000018 | 0.281460 | -5.8 | 0.6 | 2456 | 2869 |
| T-1 34 | 1845 | 18 | 2 | 0.0239 | 0.0007 | 0.281484 | 0.000015 | 0.281460 | -5.3 | 0.5 | 2451 | 2852 |
| T-1 36 | 1865 | 17 | 6 | 0.0290 | 0.0008 | 0.281484 | 0.000013 | 0.281455 | -5.0 | 0.5 | 2460 | 2851 |
| T-1 37 | 1876 | 17 | -1 | 0.0440 | 0.0014 | 0.281497 | 0.000014 | 0.281447 | -5.0 | 0.5 | 2480 | 2861 |
| T-1 40 | 1842 | 18 | 0 | 0.0302 | 0.0009 | 0.281431 | 0.000013 | 0.281400 | -7.5 | 0.4 | 2536 | 2989 |
| T-1 43 | 1836 | 17 | 7 | 0.0214 | 0.0006 | 0.281435 | 0.000016 | 0.281414 | -7.1 | 0.6 | 2513 | 2962 |
| T-1 47 | 1869 | 17 | 0 | 0.0292 | 0.0009 | 0.281490 | 0.000016 | 0.281459 | -4.8 | 0.6 | 2455 | 2839 |
| T-1 49 | 2246 | 16 | 7 | 0.0156 | 0.0007 | 0.281304 | 0.000014 | 0.281275 | -2.7 | 0.5 | 2694 | 2998 |
| T-1 51 | 1888 | 17 | 3 | 0.0212 | 0.0006 | 0.281443 | 0.000014 | 0.281422 | -5.6 | 0.5 | 2500 | 2909 |
| T-1 54 | 1879 | 16 | 0 | 0.0380 | 0.0011 | 0.281493 | 0.000017 | 0.281452 | -4.8 | 0.6 | 2468 | 2848 |
| T-1 57 | 1841 | 18 | 0 | 0.0213 | 0.0007 | 0.281449 | 0.000014 | 0.281425 | -6.6 | 0.5 | 2499 | 2934 |
| T-1 58 | 1866 | 17 | 1 | 0.0260 | 0.0009 | 0.281464 | 0.000017 | 0.281433 | -5.7 | 0.6 | 2490 | 2899 |
| T-1 60 | 1876 | 17 | 1 | 0.0216 | 0.0007 | 0.281485 | 0.000015 | 0.281461 | -4.5 | 0.5 | 2449 | 2829 |
| T-1 61 | 1845 | 41 | 3 | 0.0388 | 0.0011 | 0.281479 | 0.000017 | 0.281440 | -6.0 | 0.6 | 2485 | 2897 |
| T-1 62 | 1694 | 51 | 10 | 0.0258 | 0.0009 | 0.281459 | 0.000015 | 0.281431 | -9.7 | 0.5 | 2497 | 3017 |
| T-1 63 | 1846 | 18 | 8 | 0.0356 | 0.0011 | 0.281500 | 0.000017 | 0.281463 | -5.2 | 0.6 | 2454 | 2846 |
| T-2 06r | 1877 | 13 | 1 | 0.0204 | 0.0006 | 0.281485 | 0.000021 | 0.281462 | -4.5 | 0.7 | 2447 | 2826 |
| T-2 07c | 2420 | 10 | 4 | 0.0259 | 0.0009 | 0.281225 | 0.000024 | 0.281185 | -1.9 | 0.8 | 2814 | 3080 |
| T-2 09 | 1896 | 14 | 1 | 0.0248 | 0.0007 | 0.281495 | 0.000024 | 0.281469 | -3.8 | 0.9 | 2439 | 2799 |
| T-2 15 | 1883 | 14 | 0 | 0.0285 | 0.0009 | 0.281544 | 0.000022 | 0.281513 | -2.5 | 0.8 | 2380 | 2707 |
| T-2 16 | 1870 | 13 | 0 | 0.0422 | 0.0013 | 0.281617 | 0.000021 | 0.281571 | -0.8 | 0.7 | 2307 | 2586 |
| T-2 17 | 1899 | 15 | 1 | 0.0419 | 0.0013 | 0.281498 | 0.000025 | 0.281452 | -4.3 | 0.9 | 2469 | 2834 |
| T-2 18 | 1886 | 21 | 1 | 0.0244 | 0.0008 | 0.281506 | 0.000020 | 0.281479 | -3.7 | 0.7 | 2426 | 2782 |
| T-2 21 | 1818 | 45 | 9 | 0.0331 | 0.0010 | 0.281486 | 0.000014 | 0.281452 | -6.2 | 0.5 | 2467 | 2888 |
| T-2 23 | 1184 | 18 | 0 | 0.0268 | 0.0009 | 0.282092 | 0.000012 | 0.282072 | 1.5 | 0.4 | 1629 | 1911 |
| T-2 25 | 1819 | 17 | 1 | 0.0403 | 0.0012 | 0.281482 | 0.000016 | 0.281440 | -6.6 | 0.6 | 2487 | 2914 |
| T-2 26 | 1864 | 17 | 4 | 0.0253 | 0.0008 | 0.281494 | 0.000015 | 0.281465 | -4.7 | 0.5 | 2446 | 2829 |
| T-2 27 | 1845 | 17 | 2 | 0.0095 | 0.0003 | 0.281451 | 0.000014 | 0.281441 | -5.9 | 0.5 | 2470 | 2894 |
| T-2 28 | 1838 | 17 | 0 | 0.0309 | 0.0009 | 0.281523 | 0.000015 | 0.281490 | -4.4 | 0.5 | 2415 | 2790 |
| T-2 31 | 1828 | 17 | 0 | 0.0113 | 0.0003 | 0.281432 | 0.000015 | 0.281421 | -7.0 | 0.5 | 2498 | 2951 |
| T-2 32 | 1803 | 18 | 0 | 0.0401 | 0.0013 | 0.281449 | 0.000013 | 0.281405 | -8.2 | 0.5 | 2537 | 3003 |

*Disc. = [1−(206Pb/238U age)/(207Pb/206Pb age)]×100 for Precambrian zircons, and Disc. = [1−(206Pb/238U age)/(207Pb/235U age)] × 100 for Phanerozoic zircons

c and r represent the core and rim of the zircons

eHf(t) = 10,000{[(176Hf/177Hf)S–(176Lu/177Hf)S×(eλt–1)]/[(176Hf/177Hf)CHUR,0–(176Lu/177Hf)CHUR×(eλt–1)]–1}

TDM = 1/λ×(1 + ((176Hf/177Hf)S − (176Hf/177Hf)DM)/((176Lu/177Hf)S − (176Lu/177Hf)DM))

TCDM = 1/λ×ln{1 + [(176Hf/177Hf)S, t–(176Hf/177Hf)DM, t]/[(176Lu/177Hf)C–(176Lu/177Hf)DM]} + t

The 176Hf/177Hf and 176Lu/177Hf ratios at the present are 0.282772 and 0.0332 for chondrite, and 0.28325 and 0.0384 for depleted mantle, respectively (Blichert-Toft and Albarède, 1997; Griffin et al., 2000). λ= 1.867 ×10-11 a-1 (Soderlund et al., 2004). (176Lu/177Hf)C = 0.015 and (176Lu/177Hf)C = 0.0384. t = crystallization age of zircon.
